# Multicellular growth and sporulation in filamentous actinobacteria require the conserved cell division protein SepX

Matthew J. Bush<sup>1</sup>, Kelley A. Gallagher<sup>1,3</sup>, Govind Chandra<sup>1</sup>, Kim C. Findlay<sup>2</sup> and Susan Schlimpert<sup>1\*</sup>

<sup>1</sup> Department of Molecular Microbiology, John Innes Centre, Norwich, UK

<sup>2</sup> Department of Cell and Developmental Biology, John Innes Centre, Norwich, UK

<sup>3</sup> Département de Microbiologie, Infectiologie et Immunologie, Université de Montréal, Montréal, Canada

\* Correspondence: [susan.schlimpert@jic.ac.uk](mailto:susan.schlimpert@jic.ac.uk)

## ABSTRACT

Filamentous actinobacteria like *Streptomyces* undergo two distinct modes of cell division, leading to the partitioning of growing hyphae into multicellular compartments via cross-walls and to the septation and release of unicellular spores. While some progress has been made towards the regulation of sporulation-specific cell division, specific determinants for cross-wall formation and the importance of hyphal compartmentalization for *Streptomyces* development have remained unknown. Here we describe SepX, an actinobacterial-specific protein that is crucial for both cell division events in *Streptomyces*. We show that *sepX*-deficient mutants grow without cross-walls and that this substantially impairs the fitness of colonies and the coordinated progression through the developmental life cycle. Protein interaction studies and live-cell imaging suggest that SepX functions to spatially stabilize the divisome, a mechanism that also requires the dynamin-like protein DynB. Collectively, this work identifies an important determinant for cell division in filamentous actinobacteria that is required for multicellular development and sporulation.

Keywords: Bacterial cell division, *Streptomyces*, multicellular growth, sporulation, cross-walls, FtsZ

## INTRODUCTION

Most bacteria divide by binary fission which results in the generation of two virtually identical daughter cells that physically separate to colonize new environmental niches. However, in filamentous growing organisms, such as the abundant soil bacteria of the genus *Streptomyces*, two functionally distinct modes of cell division exist: cross-wall formation in vegetative hyphae and sporulation in aerial hyphae (Figure 1a). Cross-walls are division septa that partition growing hyphae at irregular intervals into multinucleoid compartments, reminiscent of fungal hyphae. In contrast, sporulation-specific cell division results in the formation of ladder-like arrays of division septa that are structurally distinct from cross-walls, and which lead to cell fission and the release of unigenomic spores<sup>1</sup>. While sporulation is an important strategy for survival and propagation<sup>2,3</sup>, the physiological significance of cross-wall formation during vegetative growth has remained enigmatic.

At the heart of both division processes is the almost universally conserved cell division protein FtsZ that assembles into a contractile ring-like structure called the Z-ring. The Z-ring acts as a scaffold for the assembly of the cell division machinery (the divisome) and guides the synthesis of septal peptidoglycan<sup>4,5</sup>. *Streptomyces* encode several orthologues of the core divisome components from *E. coli* or *B. subtilis*, such as FtsK, FtsQ, FtsL, DivIC and the cell wall synthetic enzymes FtsI and FtsW<sup>6,7</sup>. Moreover, additional factors have been identified that associate with the divisome and/or contribute to the efficient assembly and stability of Z-rings. These proteins include the actinobacterial-specific protein SsgB, which has been reported to mark future sporulation-septation sites<sup>8</sup>, SepF, which functions as a membrane anchor for FtsZ<sup>9-11</sup>, SepH, which stimulates FtsZ filament assembly<sup>12</sup>, the two dynamin-like proteins DynA and DynB, which stabilize FtsZ-rings during sporulation, and two SepF-like proteins of unknown function<sup>11</sup>. Previous genetic studies have shown that none of the conserved and species-specific cell division proteins are essential

for growth and viability in *Streptomyces*<sup>6,7</sup>. While the deletion of core cell division genes, including *ftsQ*, *ftsL*, *divIC*, *ftsW* or *ftsI*, appears to largely affect sporulation septation<sup>6,8,11-13</sup>, a *Streptomyces*  $\Delta$ *ftsZ* mutant is both unable to sporulate and to compartmentalize the vegetative mycelium, resulting in a single-celled, branched mycelial network. Hence, to-date *ftsZ* is the only known determinant of cross-wall formation.

Here, we report the identification of a novel *Streptomyces* divisome component, SepX, that is required for compartmentalization of the vegetative hyphae and normal sporulation in the aerial hyphae. Besides *ftsZ*, *sepX* is the only other determinant of vegetative septation identified so far and we show that cross-wall formation is crucial for fitness and cellular development in *Streptomyces*. We further demonstrate that SepX also plays an important role in sporulation-specific cell division via a direct interaction with the bacterial dynamin-like protein DynB, which was previously shown to contribute to Z-ring stability. We found that while either of the proteins is dispensable for sporulation, deletion of both *sepX* and *dynB* impairs stable Z-ring formation and function, and consequently abolishes sporulation-specific cell division.

## RESULTS

### *SepX co-localizes with FtsZ at vegetative and sporulation division sites*

In *S. venezuelae*, the initiation of sporulation-specific cell division is co-controlled by the WhiA and WhiB transcription factors<sup>14,15</sup>. Using chromatin-immunoprecipitation (ChIP)-seq in concert with microarray transcriptional profiling, we previously revealed the WhiAB-mediated activation of several genes encoding core members of the bacterial division machinery, including *ftsW*, *ftsK* and *ftsZ*. WhiA and WhiB together control the expression of ~240 transcriptional units and we

reasoned that other genes encoding key components of the *Streptomyces* division machinery might also be under WhiAB control. Therefore, we constructed various strains expressing fluorescently tagged WhiAB-target proteins, prioritizing those encoded by conserved and uncharacterized genes with a clear dependence upon WhiA and WhiB for their expression.

As part of this study, we examined the localization of a protein encoded by *vnz\_14865* (now named SepX for “septal protein X”), a target of WhiAB-mediated activation (Supplementary Figure 1a). SepX is a 344-amino acid membrane protein that contains two largely unstructured regions predicted to reside in the cytoplasm (Figure 1B). To visualize its subcellular localization, we constructed a merodiploid strain in which *sepX* was fused to *mcherry* and expressed *in trans* from its native promoter from the  $\Phi$ BT1 integration site. This strain additionally carried a  $P_{ftsZ}$ -*ftsZ*-*ypet* gene fusion, thereby allowing us to fluorescently label both vegetative and sporulation septa. Microscopic analysis of this dual-labelled strain revealed that SepX-mCherry co-localizes with FtsZ at both vegetative cross-walls and sporulation septa (Figure 1C). We were unable to resolve whether SepX localization precedes the arrival of FtsZ, due to the weak fluorescent signal of the SepX-mCherry fusion when produced from its native promoter. The presence of SepX at both cell division sites is in line with transcriptomics data that showed expression of the *sepX* gene both during vegetative and reproductive growth. Furthermore, albeit at reduced levels, *sepX* transcripts were also detected in the absence of WhiA or WhiB (Supplementary Figure 1b), indicating that expression of *sepX* might be controlled by an additional factor.

To determine if SepX accumulation at nascent division sites was dependent on FtsZ, we inserted the *sepX*-*mcherry* fusion into the

$\Delta$ *ftsZ* null mutant *in trans*. SepX-mCherry was produced from the constitutive *ermE\** promoter to ensure expression in the mutant background. Subsequently, we inspected hyphae of the resulting strain by fluorescence microscopy. In addition, we used the fluorescent D-amino acid analogue HADA to label cell wall peptidoglycan, including cross-walls and sporulation septa<sup>16</sup>. As expected, *ftsZ*-deficient hyphae were devoid of division septa. In these continuous hyphae, SepX-mCherry was stably produced and appeared to be distributed evenly within the hyphae, indicating that the distinct localization pattern of SepX-mCherry observed in the wildtype requires FtsZ (Supplementary Figure 1 c and d).

### *SepX* is required for hyphal compartmentalization and sporulation septation

Intrigued by the accumulation of SepX at both types of division septa, we engineered an in-frame gene deletion and examined the importance of SepX for cell division during vegetative growth and sporulation. Using the fluorescent membrane dye FM4-64, we first visualized cross-walls in *S. venezuelae*, comparing the wildtype to the  $\Delta$ *sepX* mutant. Strikingly, deletion of *sepX* led to a vegetative mycelium almost completely devoid of cross-walls (Figure 2a and b).

To better understand the effect of a *sepX* deletion on the overall frequency of cross-wall formation, we quantified the number of cross-walls produced in hyphae during vegetative growth. To achieve this, we allowed spores of the wildtype, the  $\Delta$ *sepX* mutant and the complemented mutant ( $\Delta$ *sepX*/*sepX*<sup>+</sup>) to germinate and grow in the presence of HADA in a microfluidic device for 5 to 6 hours. We then imaged emerging hyphae by fluorescence microscopy and quantified the number of cross-walls per hypha. We found that in wild-type

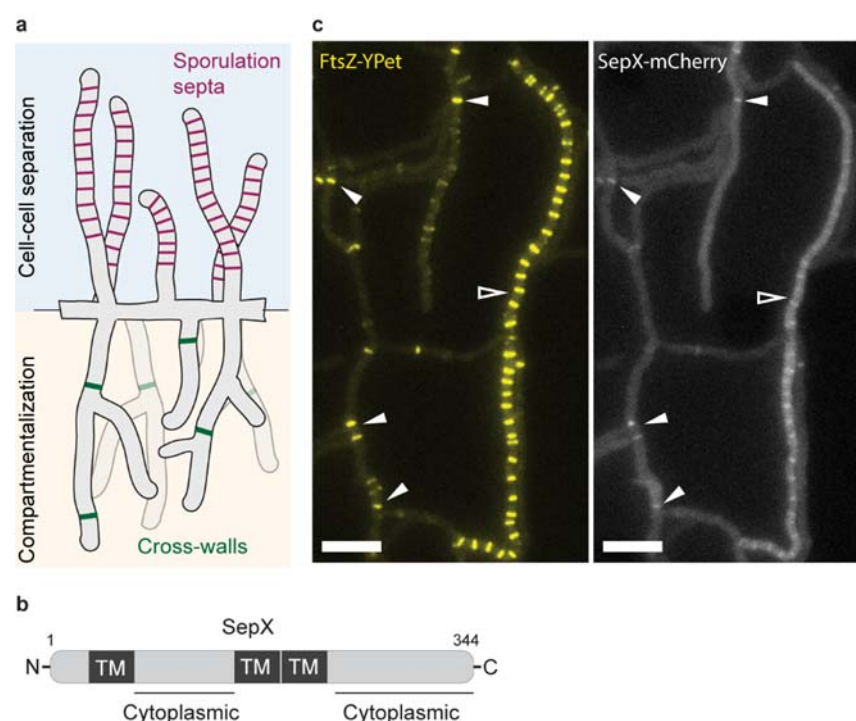

**Figure 1. SepX co-localizes with FtsZ at cross-walls and sporulation septa.** (a) Schematic showing the two kinds of division septa that are formed in *Streptomyces*: vegetative cross-walls (green) and sporulation septa (magenta). (b) Schematic depicting the predicted domain organization of SepX (*vnz\_14865*), including three trans-membrane (TM) segments and two cytoplasmic loops. Numbers denote amino acid count. (c) Microscopic analysis of a merodiploid strain expressing both a SepX-mCherry fusion and an FtsZ-YPet fusion (MB256) reveals that SepX and FtsZ co-localize at both cross-walls (filled arrows) and sporulation septa (open arrow). Scale bar: 5  $\mu$ m.

*S. venezuelae* cross-walls are synthesized on average every 20 to 30  $\mu\text{m}$  (Figure 2c). In agreement with the FM4-64 membrane staining (Figure 2b), deletion of *sepX* led to an almost total lack of cross-walls within the vegetative mycelium. Very occasionally, cross-wall formation occurred close to the “mother” spore, but even where such cross-walls were observed, the resulting vegetative mycelium was devoid of septa (Supplementary Figure 2a). The frequency of cross-wall formation was restored when  $\Delta\text{sepX}$  was complemented *in trans*.

Since a  $\Delta\text{sepX}$  mutant is almost devoid of cross-walls, we wondered whether constitutive expression of *sepX* would lead to a converse increase in cross-wall frequency during vegetative growth. Therefore, we repeated our HADA labelling experiments with a strain that expressed *sepX* *in trans* from the constitutive *ermE\** promoter<sup>17</sup> (Supplementary Figure 2e). While we did not observe any visible effects on growth and sporulation of *S. venezuelae* (Supplementary Figure 2b), we found that the number of cross-walls was markedly increased in this strain ( $\text{SepX}^{++}$ ) compared to the wildtype (Supplementary Figure 2c and d). Approximately double the number of cross-walls could be observed, with a cross-wall forming every 10-15  $\mu\text{m}$ , in the  $\text{SepX}^{++}$  strain compared to the wildtype. Constitutive expression of other divisome components that are also part of the division machinery involved in vegetative cell division and cross-wall

formation, including *sepF* and *ftsZ* itself, did not lead to an increase in cross-wall frequency (Supplementary Figure 2c and d). Thus, these results indicate that SepX abundance is a determinant for FtsZ-dependent vegetative cell division leading to hyphal compartmentalization.

Notably, our membrane staining experiments also showed that following vegetative growth, *sepX*-deficient hyphae did initiate sporulation-specific septation (Supplementary Figure 2f). However, sporulation septa that formed under these conditions were irregularly spaced or often appeared tilted, compared to the evenly spaced septa that were visible in wild-type hyphae. To further investigate the importance of SepX for sporulation-specific cell division, we imaged sporulating hyphae of the wildtype and the  $\Delta\text{sepX}$  mutant by cryo-Scanning Electron Microscopy (SEM), which confirmed a severe sporulation defect in hyphae lacking SepX (Figure 2d). In contrast to the wildtype and the complemented mutant ( $\Delta\text{sepX}/\text{sepX}^{+}$ ), no sporulation was observed after three days and *sepX*-deficient hyphae appeared distorted in shape. Given more time (> 7 days), colonies of the mutant did sporulate, but hyphae failed to deposit regularly placed septa, resulting in spores of variable length. To examine this defect in greater detail, we conducted Transmission Electron Microscopy (TEM; Supplementary Figure 2g). In some spore chains, septa failed to occur

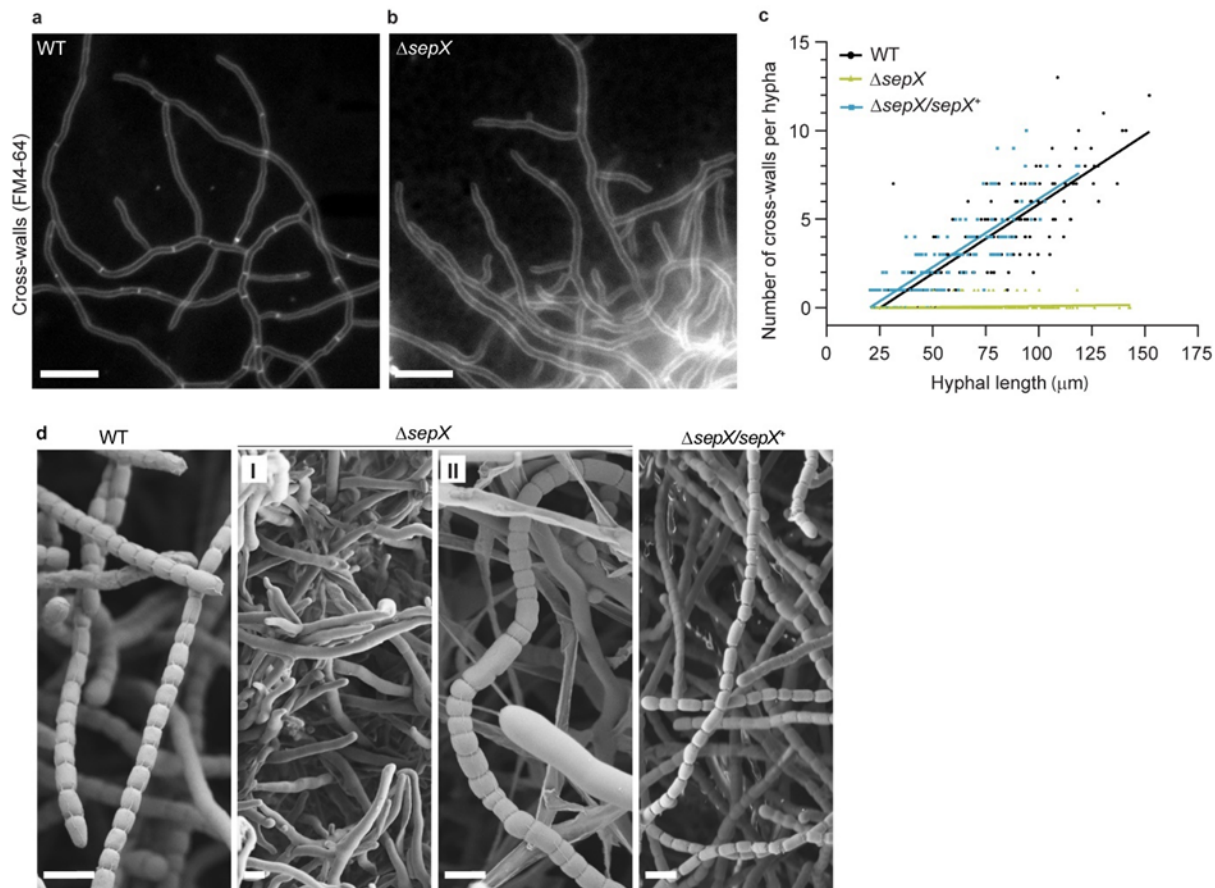

**Figure 2. SepX is required for vegetative cross-wall formation and regular sporulation septation.** (a) Cross-walls can be visualized by fluorescence microscopy after incubating wild-type (WT) *S. venezuelae* hyphae with the membrane dye FM4-64. (b) The *sepX* deletion strain (SV55) lacks cross-walls in growing hyphae, as visualized by FM4-64 staining. Scale bars in a and b: 10  $\mu\text{m}$ . (c) Quantification of cross-wall frequency in hyphae emerging from spores of the wildtype (WT), the  $\Delta\text{sepX}$  mutant (SV55) and the complemented mutant  $\Delta\text{sepX}/\text{sepX}^{+}$  (MB181). Cross-walls were visualized by growing the strains in the presence of 0.25 mM HADA for 5-6 hours following germination. Data was derived from biological triplicate experiments and at least 20 spores per replicate were analyzed. Solid lines represent simple linear regression. (d) Cryo-scanning electron micrographs showing sporulation septation in hyphae of the wildtype (WT), the  $\Delta\text{sepX}$  mutant (SV55) and the complemented mutant (MB181). Strains were grown on solid MYM and colonies imaged after 3 days. The  $\Delta\text{sepX}$  mutant does not sporulate after 3 days (I) but does eventually form irregular spore chains after 7 days (II). Scale bars: 2  $\mu\text{m}$ .



altogether, giving rise to abnormally large spores. Partial septation from one side of the sporogenic hypha was also frequently observed, suggesting FtsZ-mediated constriction had been initiated but then stalled or aborted. Most strikingly, septation occasionally appeared to occur in an altered plane, often perpendicular to the normal plane of cell division. Such irregular septation often gave rise to smaller spore-like compartments, most of which still contained genetic material. Taken together our results suggests that SepX plays a crucial role in cell division during vegetative growth and sporulation in *Streptomyces*.

### Lack of hyphal compartmentalization is crucial for fitness and cellular development

In addition to the severe cell division defects we observed by electron and light microscopy, colonies formed by the  $\Delta sepX$  mutant also displayed a striking macroscopic phenotype. Wild-type *S. venezuelae* forms roughly circular colonies, that are several millimeters in diameter after 3 days and produce the green polyketide pigment characteristic of mature *S. venezuelae* spores (Figure 3a). In contrast, the  $\Delta sepX$  mutant grew much more slowly, producing colonies that were small and aberrant in shape (Figure 3b). Colonies remained white, characteristic of a sporulation defect, as has been described for other developmental mutants<sup>18</sup>. This growth phenotype could be complemented by expressing *sepX* from the native promoter *in trans* (Figure 3c). The  $\Delta sepX$  colony morphology is reminiscent of the phenotype of an  $\Delta ftsZ$  mutant, which is devoid of cross-walls and sporulation septa (Figure 3b and d). Notably, unlike the *ftsZ* and *sepX* deletion mutants, colonies of *Streptomyces* mutants that produce cross-walls but are specifically blocked in sporulation septation, such as the  $\Delta whiA$  mutant<sup>14</sup> (Figure 3e), grew to a similar size and morphology as the wildtype. This implies that the inability to synthesize cross-walls and thus compartmentalize the growing mycelium is associated with a severe fitness penalty.

To further dissect the importance of *sepX*-dependent cross-wall formation for cellular development and sporulation, we complemented the  $\Delta sepX$  mutant with a SepX-mCherry fusion that was specifically expressed during sporulation but not during vegetative growth, thereby impairing cross-wall formation but permitting sporulation-specific cell division. Based on transcriptional profiling data<sup>19</sup> (Supplementary Figure 3a), we placed *sepX-mcherry* under the control of the sporulation-specific promoter upstream of the *whiE* operon, which directs the synthesis of the polyketide that leads to the pigmentation seen in mature *Streptomyces* spores<sup>20</sup>. Fluorescence microscopy and Western blot analysis confirmed that *P<sub>whiE</sub>* was effective in limiting SepX synthesis to the reproductive growth phase compared to strains in which *sepX-mcherry* expression was driven either from the constitutive *ermE*\* or the native promoter

(Supplementary Figure 3b and c). As expected, the absence of SepX-mCherry during vegetative growth led to an almost complete lack of cross-walls (Supplementary Figure 3d). This conditional *sepX* mutant was noticeably similar in morphology to the  $\Delta sepX$  mutant (Figure 3f). However, sporulation-specific septation occurred readily in this strain to generate spores that were largely regular in size and shape, similar to the  $\Delta sepX/P_{sepX-sepX-mcherry}$  complementation strain, suggesting that SepX was functional during sporulation (Supplementary Figure 3e). Collectively, these data suggest that SepX-mediated hyphal compartmentalization but not sporulation is crucial for growth and multicellular development in *Streptomyces*.

### SepX promotes stable Z-ring formation during sporulation septation.

Next, to further determine the role of SepX in sporulation-specific cell division, we conducted time-lapse fluorescence microscopy, tracking the assembly of FtsZ-YPet into Z-rings in wild-type *S. venezuelae* and the  $\Delta sepX$  mutant. In the wildtype, following the cessation of hyphal growth, Z-ladder formation occurred rapidly and near synchronously within the tip compartment of a hypha (Supplementary Movie S1)<sup>11,21</sup>. In contrast to the wildtype and in line with the lack of hyphal compartmentalization, we observed frequent cell lysis and highly abundant Z-ladder formation throughout the entire mycelium of the *sepX*-deficient strain (Figure 4a, b and Supplementary Movie S1 and S2). While the assembly of Z-ladders in the wildtype led to regular septation and the generation of chains of spores, completion of the sporulation process in the  $\Delta sepX$  mutant was much less efficient (Supplementary Figure 4a and b). These results were also supported by kymographs of FtsZ-YPet fluorescence from sporulating wild-type and  $\Delta sepX$  hyphae, which suggested a clear difference in the dynamics of Z-ring formation and stability (Figure 4c and d). Analysis of individual Z-rings confirmed the time-dependent and localized increase in FtsZ-YPet fluorescence intensity in wild-type hyphae, indicating the maturation and constriction of Z-rings before they eventually disassembled after approximately two hours (Figure 4e).

In *sepX*-deficient hyphae, however, Z-rings assembled much more slowly and displayed a lower average fluorescence intensity. Furthermore, although the spacing of Z-rings was similar to the wildtype (Figure 4f), individual Z-rings in  $\Delta sepX$  hyphae were on average spatially less confined compared to wild-type hyphae (Figure 4g). Notably, Western blot analysis confirmed that the alteration in Z-ring dynamics observed in the absence of *sepX* is not due to a reduction in the levels of FtsZ (Supplementary Figure 4e). Taken together, these results suggest that SepX contributes to the correct assembly and architecture of fission-competent Z-rings.

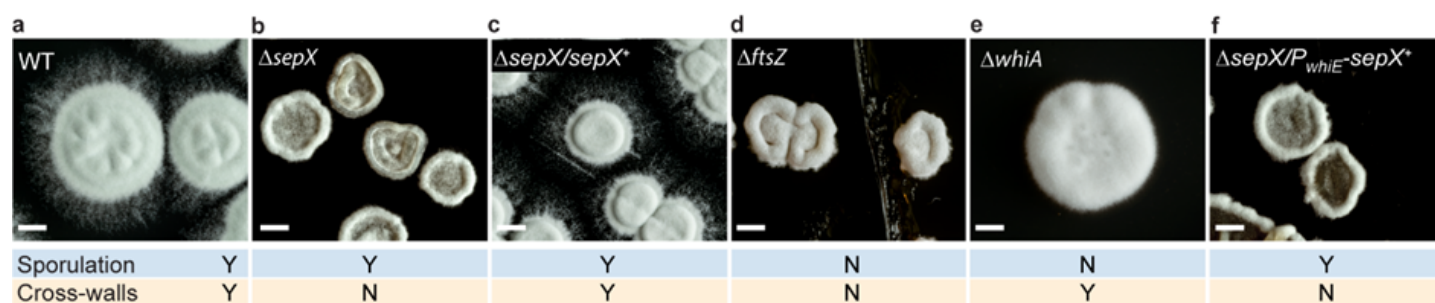

**Figure 3. Cross-walls are crucial for cellular development of *S. venezuelae*.** Representative images of the colony morphology of (a) the wild-type (WT), (b) the  $\Delta sepX$  mutant (SV55), (c) the complemented mutant (MB181), (d) the  $\Delta ftsZ$  mutant (DU669), (e) the  $\Delta whiA$  mutant (SV7), or (f) the conditional *sepX* mutant expressing *sepX* from the sporulation-specific *whiE* promoter (MB1120). All strains were grown on solid MYM and photographed after 3 days. “Y” (Yes) and “N” (No) indicate whether strains can form cross-walls and/or sporulation septa. Scale bar: 1mm.

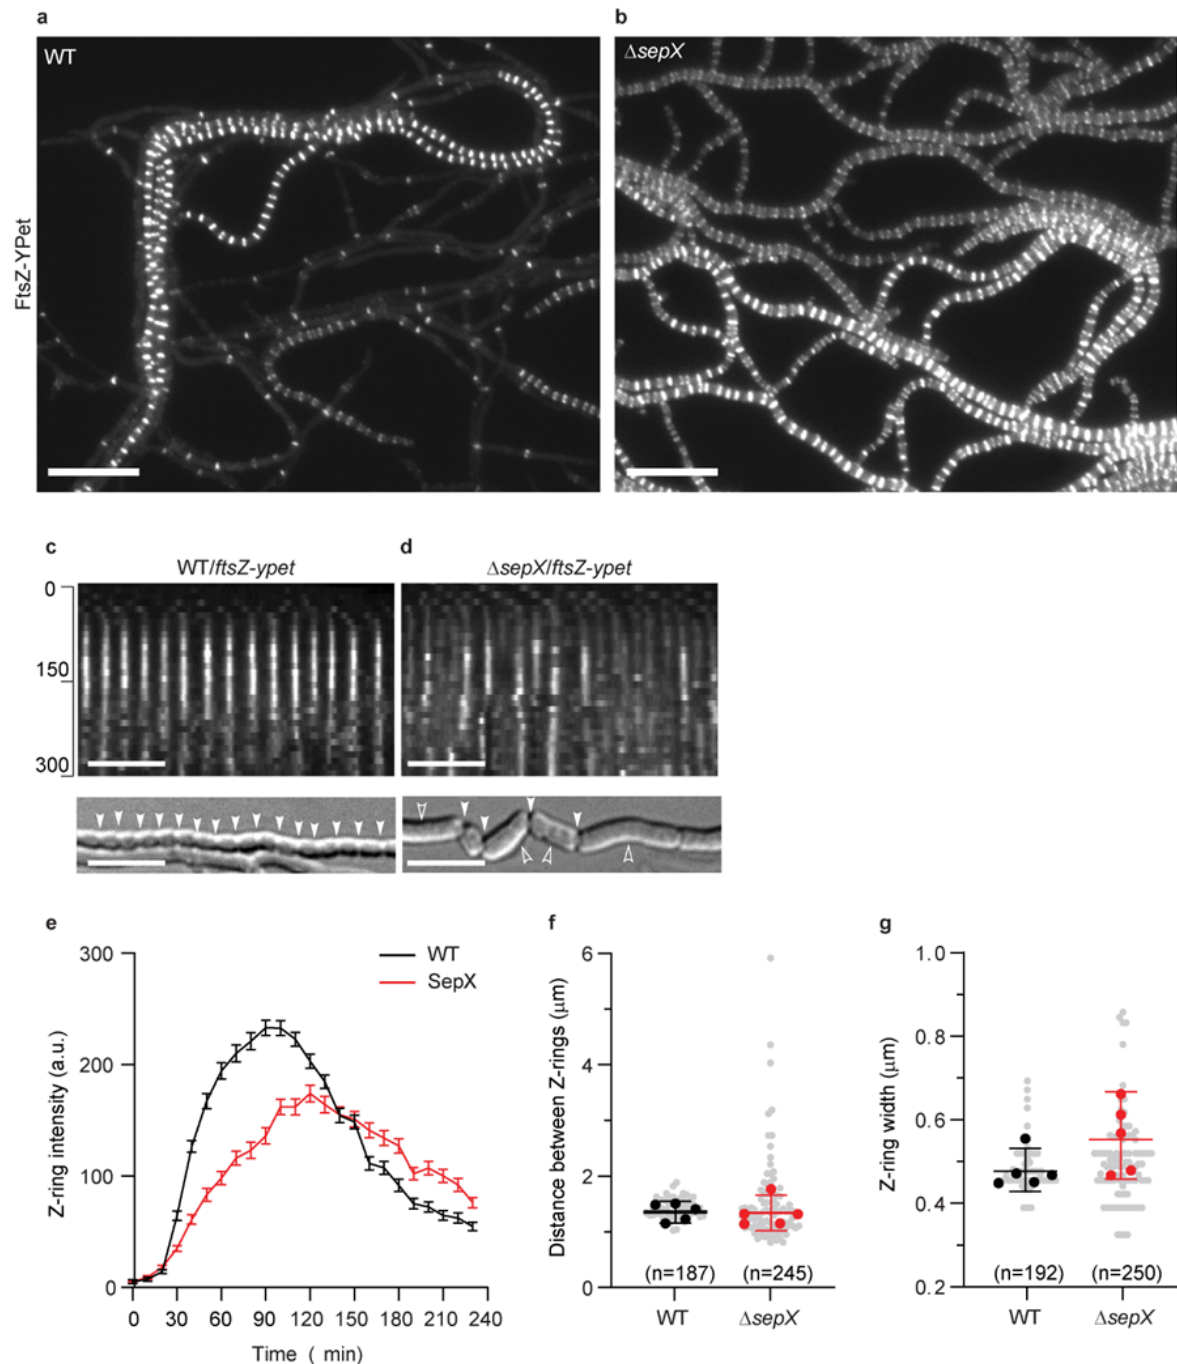

**Figure 4. *SepX* is important for Z-ring stability and architecture during sporulation-specific cell division.** Still images from Supplementary movie 1 and 2 showing YPet-labelled Z-ring formation in sporulating hyphae of (a) the wildtype (SS12) or (b) the  $\Delta$ *sepX* mutant (MB180). Scale bar: 10  $\mu$ m. (c) and (d) Subsection of representative kymographs (top panel) showing the spatiotemporal localization of FtsZ-YPet in (c) the wildtype (WT, SS12) and (d) the  $\Delta$ *sepX* mutant (MB180). Y-axis shows imaging duration. Bottom panel depicts terminal sporulation phenotype with filled arrow heads pointing at completed sporulation septa, open arrow heads at failed septation. Scale bars: 5  $\mu$ m. Complete kymographs are shown in Supplementary Figure 4c and d. (e) Fluorescence intensity traces of FtsZ-YPet (Z-rings) over time derived from sporulating WT (SS12) and  $\Delta$ *sepX* mutant hyphae (MB180). Shown are the mean fluorescence intensity traces (mean  $\pm$  SEM) collected from Z-rings of five sporulating hyphae for each strain. (f) Distance and (g) width of Z-rings in sporulating hyphae of WT (SS12) and *sepX*-deficient hyphae (MB180). The same data set as in (e) was used and the mean width for each replicate (black and red dots, n = 5)  $\pm$  95% CI was plotted.

# SepX interacts with the cell division machinery

SepX is comprised of three predicted transmembrane segments connected by two largely disordered and cytoplasmic regions (Figure 1b). Given the lack of any obvious catalytic domain, we reasoned that SepX might fulfil a structural role to support the assembly of the cell division machinery.

To test this idea, we performed a targeted bacterial two-hybrid analysis, screening for interaction between SepX and known *Streptomyces* divisome components, including SepF, the two additional SepF-like proteins SepF2 and SepF3, the two dynamin-like proteins DynA and DynB and the actinomycete-specific cell division protein SsgB<sup>8,11</sup>. We were unable to test for an interaction with FtsZ because we previously found that *S. venezuelae* FtsZ is not functional in this assay<sup>11</sup>. Using  $\beta$ -galactosidase assays to assess the interaction between the individual two-hybrid combinations, we found that SepX could self-interact and interacted with DynB but did not bind the DynB partner protein DynA or any of the other divisome components tested (Figure 5a and Supplementary Figure 5a). Like SepX, DynB is also associated with the membrane via two transmembrane segments<sup>11</sup>. Our two-hybrid results further imply that the DynB membrane domains are crucial for SepX binding (Supplementary Figure 5a). To verify that the observed interaction was specific, we also included the transmembrane anti-sigma factor RsbN, which strongly interacts with its cognate sigma factor,  $\sigma^{\text{BldN}}$  (<sup>19</sup>), in our two-hybrid analyses. Importantly, neither SepX

nor DynB interacted with RsbN, supporting the notion that SepX specifically associates with DynB (Supplementary Figure 5b).

To further support the two-hybrid results, we performed co-immunoprecipitation coupled to mass spectrometry (CoIP-MS/MS) with a  $\Delta\text{sepX}$  strain that produced a FLAG-tagged copy of *sepX* from its native promoter *in trans*. Sporulating cultures of this strain were cross-linked and SepX-FLAG was recovered from the cell lysate using anti-FLAG antibody-conjugated magnetic beads. Proteins retained on the beads were eluted and analyzed by mass spectrometry. In parallel, we performed control experiments with an untagged wild-type strain to identify proteins that bound non-specifically to the anti-FLAG antibody or to the beads. Inspection of obtained peptide profiles revealed a clear enrichment of SepX in the FLAG samples compared to the control samples. In addition, we detected an at least 2-fold enrichment of DynB and its partner protein DynA, and several additional cell division proteins, including SepF, SepF2, SsgB and FtsK (Figure 5b). Previous work had demonstrated that DynB is involved in Z-ring stabilization during sporulation-specific cell division and associates with the divisome by binding to SsgB and SepF2, which in turn are either directly (SsgB) or indirectly (SepF2) connected with the Z-ring<sup>8,11</sup>. Thus, our protein-protein interaction studies place SepX in a network of interactions involving key divisome components involved in FtsZ ring positioning, anchoring and stability (Figure 5c).

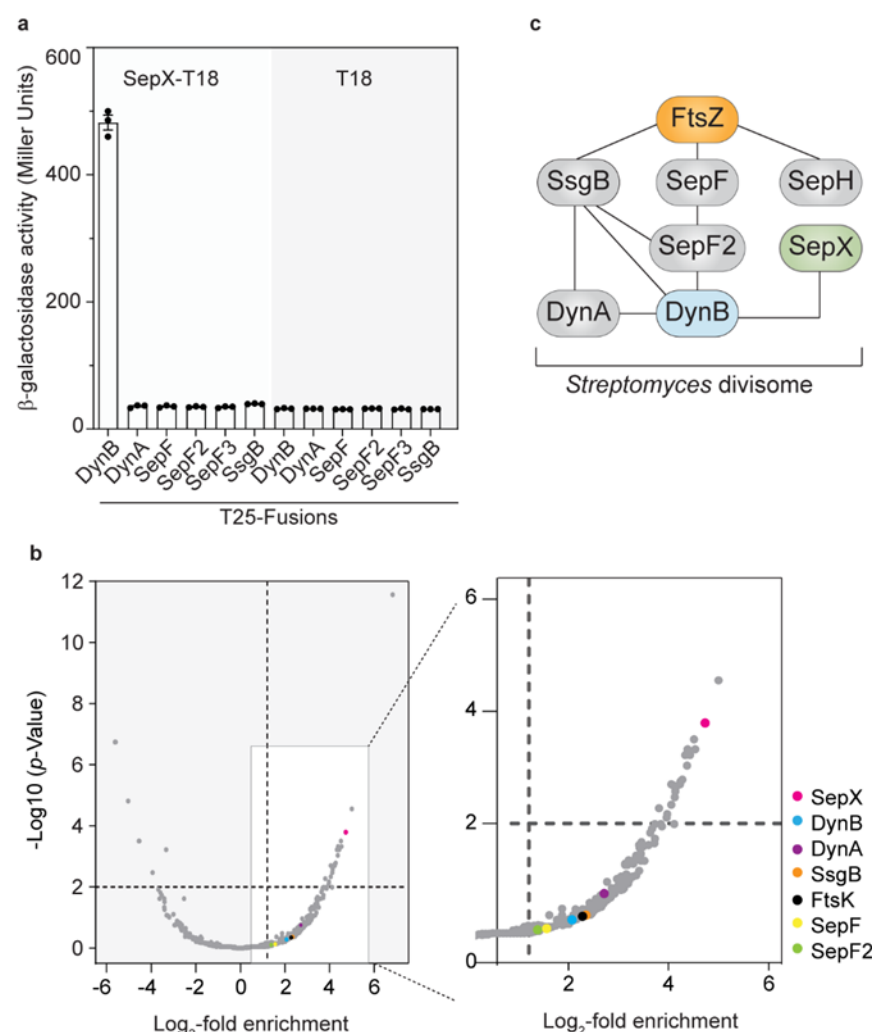

**Figure 5. SepX is part of the *S. venezuelae* divisome and specifically interacts with DynB.** **(a)** Bacterial two-hybrid analysis and corresponding  $\beta$ -galactosidase activities between SepX-T18 or the empty plasmid (T18) and the indicated T25-fusions. Each interaction was assayed in biological triplicate. **(b)** Co-immunoprecipitation and mass spectrometry analysis of SepX. Immunoprecipitation experiments were performed using the control strain SS92 (*dynB-ypet*) or a strain expressing a *sepX-FLAG/dynB-ypet* fusion (MB942) and anti-Flag antibody-conjugated magnetic beads. Proteins that were retained on the beads were analyzed using mass spectrometry. Data obtained from three biological replicate experiments are displayed as a volcano plot (left) with several putative interaction partners highlighted in the enlarged subsection of the plot (right). **(c)** Schematic showing the proposed SepX interaction network, including DynB and several known *S. venezuelae* divisome components<sup>11,12</sup>.



### ***Sporulation-septation requires either SepX or the dynamin-like protein DynB but cannot occur in the absence of both.***

We noted that the sporulating hyphae of the  $\Delta sepX$  mutant often displayed asymmetric and incomplete constrictions (Supplementary Figure 2g). This phenotype had previously also been reported for a *S. venezuelae* strain lacking the two divisome-associated proteins DynA and DynB, which are both required for wildtype-like sporulation<sup>11</sup>. Given that the  $\Delta sepX$  and the  $\Delta dynAB$  mutant share a similar sporulation defect, that all three proteins co-localize with FtsZ at sporulation septa and that SepX and DynB physically interact *in vivo*, we ask if SepX and DynB are functionally redundant or fulfil an independent role during sporulation-specific cell division.

To address this question, we first tested whether the interaction between SepX and DynB is required for the accumulation of either protein at nascent sporulation septa. Fluorescent microscopy revealed that SepX-mCherry was able to localize to both vegetative cross-walls and sporulation septa in the absence of *dynAB* (Figure 6a). Likewise, YPet-labelled DynB accumulated in the expected ladder-like pattern during sporulation in the absence of *sepX* (Figure 6b). Therefore while, SepX and DynB may interact, this interaction is not required for the recruitment of either component to future division sites. Furthermore, expression of *sepX* from the constitutive *ermE\** promoter could not suppress the sporulation defects observed in the  $\Delta dynB$  mutant. Equally, expression of *dynAB* from the *ermE\** promoter could not complement the  $\Delta sepX$  mutant (Supplementary Figure 6a-e, h and i). These findings suggest that DynB and SepX function independently during sporulation-specific cell division.

Since SepX and DynB are both individually important for normal sporulation in *S. venezuelae*, we additionally engineered a strain of *S. venezuelae* that lacked both *sepX* and *dynB*. Unlike the parental  $\Delta dynB$  mutant, colonies of the  $\Delta sepX \Delta dynB$  double mutant were small, reflecting the fitness cost we had shown to be associated with the deletion of *sepX* and the resulting absence of vegetative cross-walls (Figure 6c). In contrast to  $\Delta dynB$  and  $\Delta sepX$  single mutants, which sporulate, albeit aberrantly (Supplementary Figure 6a-c), cryo-SEM analysis showed that the  $\Delta sepX \Delta dynB$  double mutant largely failed to sporulate on solid media and displayed extensive lysis frequently within the mycelium (Figure 6d). Occasionally we observed a very low number of spore-like cells at the outer edge of the colony, which were highly aberrant in size and shape (Supplementary Figure 6f). Importantly, complementation of the double mutant with *dynB* reconstituted the  $\Delta sepX$  mutant phenotype while complementation with *sepX* reconstituted the  $\Delta dynB$  mutant phenotype, resulting in irregular sporulation in both cases (Figure 6e). Wildtype-like sporulation could only be restored when the double mutant was complemented with both *sepX* and *dynB* *in trans* (Figure 6f).

In addition, we examined the localization of FtsZ-YPet in the  $\Delta sepX \Delta dynB$  double mutant using fluorescence time-lapse microscopy. During vegetative growth, FtsZ-YPet displayed a similar distribution compared to the  $\Delta sepX$  mutant, with FtsZ-ring-like structures that sporadically assembled and continued to migrate in growing hyphae (Supplementary Movie 3). Consistent with the severe growth and septation defects of the  $\Delta sepX \Delta dynB$  double mutant on solid medium (Figure 6c), we also found that the mutant hyphae were prone to frequent large-scale lysis events. In the few hyphae where sporulation septation completed, FtsZ-YPet localization was highly aberrant, with the Z-rings being irregularly laid down and much less spatially confined compared to the Z-rings established in the wildtype (Figure 6h and Figure 4c). As observed for the  $\Delta sepX$  mutant strain, FtsZ levels in the  $\Delta sepX \Delta dynB$  double mutant were similar to those of the wildtype and the  $\Delta dynB$  mutant (Supplementary Figure 6g), indicating the phenotype

arises from a defect in the efficient assembly of division-competent Z-rings, rather than insufficient FtsZ.

Finally, given the complexity of the *Streptomyces* life cycle, we performed phylogenetic analysis to determine whether SepX and DynB are predominantly found in *Streptomyces* species, or are also present in other actinobacterial systems that divide by binary fission. We first searched 62-representative Streptomycetaceae genomes and confirmed the co-conservation of SepX and DynB homologues throughout the genus (Supplementary Figure 7a). In the wider actinobacteria, a search of 673 representative genomes revealed that *sepX-dynB* co-occurrence is also frequently found outside of the genus *Streptomyces*, including in unicellular actinobacteria (Supplementary Figure 7b). These results suggest that the role of DynB and SepX in cell division could be widely conserved and not limited to filamentous actinobacteria.

Taken together, our results demonstrate that SepX and DynB have distinct but synergistic roles in ensuring the stability and function of the Z-ring in *Streptomyces*. In addition, sporulation-specific cell division cannot occur effectively in the absence of both SepX and DynB, further underlining their collective importance as central components of the *Streptomyces* cell division machinery.

## **DISCUSSION**

The *Streptomyces* life cycle is characterized by two distinct FtsZ-dependent modes of cell division that lead to the separation of growing hyphal filaments into multigenomic compartments and to the formation and release of unigenomic spores. While some recent progress has been made towards the understanding of the components involved in sporulation-specific sporulation<sup>6,8,11,12</sup>, little has been known about the determinants for FtsZ-mediated cross-wall formation. Here we describe a novel cell division protein, SepX, which is crucial for cross-wall formation and efficient sporulation in *Streptomyces*. Our work suggests that SepX functions as a structural component of the divisome and contributes to the spatial confinement and stability of the divisome during vegetative growth and sporulation (Figure 7).

Our work reveals that SepX accumulates with FtsZ at future division sites in both vegetative and sporulating hyphae (Figure 1). Importantly, deletion of *sepX* results in severe cell division defects during both vegetative and reproductive growth. Deletion of *sepX* leads to a vegetative mycelium without cross-walls, in turn causing a lack of hyphal compartmentalization. In agreement with Santos-Benoit and co-workers<sup>22</sup>, we did not observe any additional membranous structures in the cytoplasm, also referred to as cross-membranes, which have been proposed to contribute to the subcellular organization of *Streptomyces*<sup>23,24</sup>. Apart from FtsZ, which is essential to form both vegetative and sporulation septa<sup>6,25,26</sup>, SepX is the first identified protein specifically required for cross-wall formation.

We show that it is the inability to divide the mycelial network into compartments that results in a fitness cost, reduced growth, and aberrant colony morphology (Figure 3). In agreement with previous work<sup>25</sup>, we found that in the absence of cross-walls, growing hyphae were prone to lysis, suggesting that cross-wall formation protects the mycelial mass from large-scale loss of viability. Furthermore, we propose the organization of hyphae into compartments could also contribute to the ordered progression through the *Streptomyces* life cycle. This hypothesis is supported by the observation of fluorescently labelled Z-ring formation at the onset of sporulation in our time-lapse microscopy analyses. In wild-type hyphae stacks of Z-rings assemble in the tip compartment of sporogenic hyphae, but in *sepX*-deficient hyphae there is a dramatic sudden burst of Z-ring assembly which spreads through the entire microcolony (Figure 4a and b, Supplementary

Movie 1 and 2). Interestingly, recent work by Zacharia et al. (2021)<sup>27</sup> revealed that the spatial organization of specialized cell types within

*S. coelicolor* colonies is determined by the ordered spatiotemporal expression of key developmental promoters.

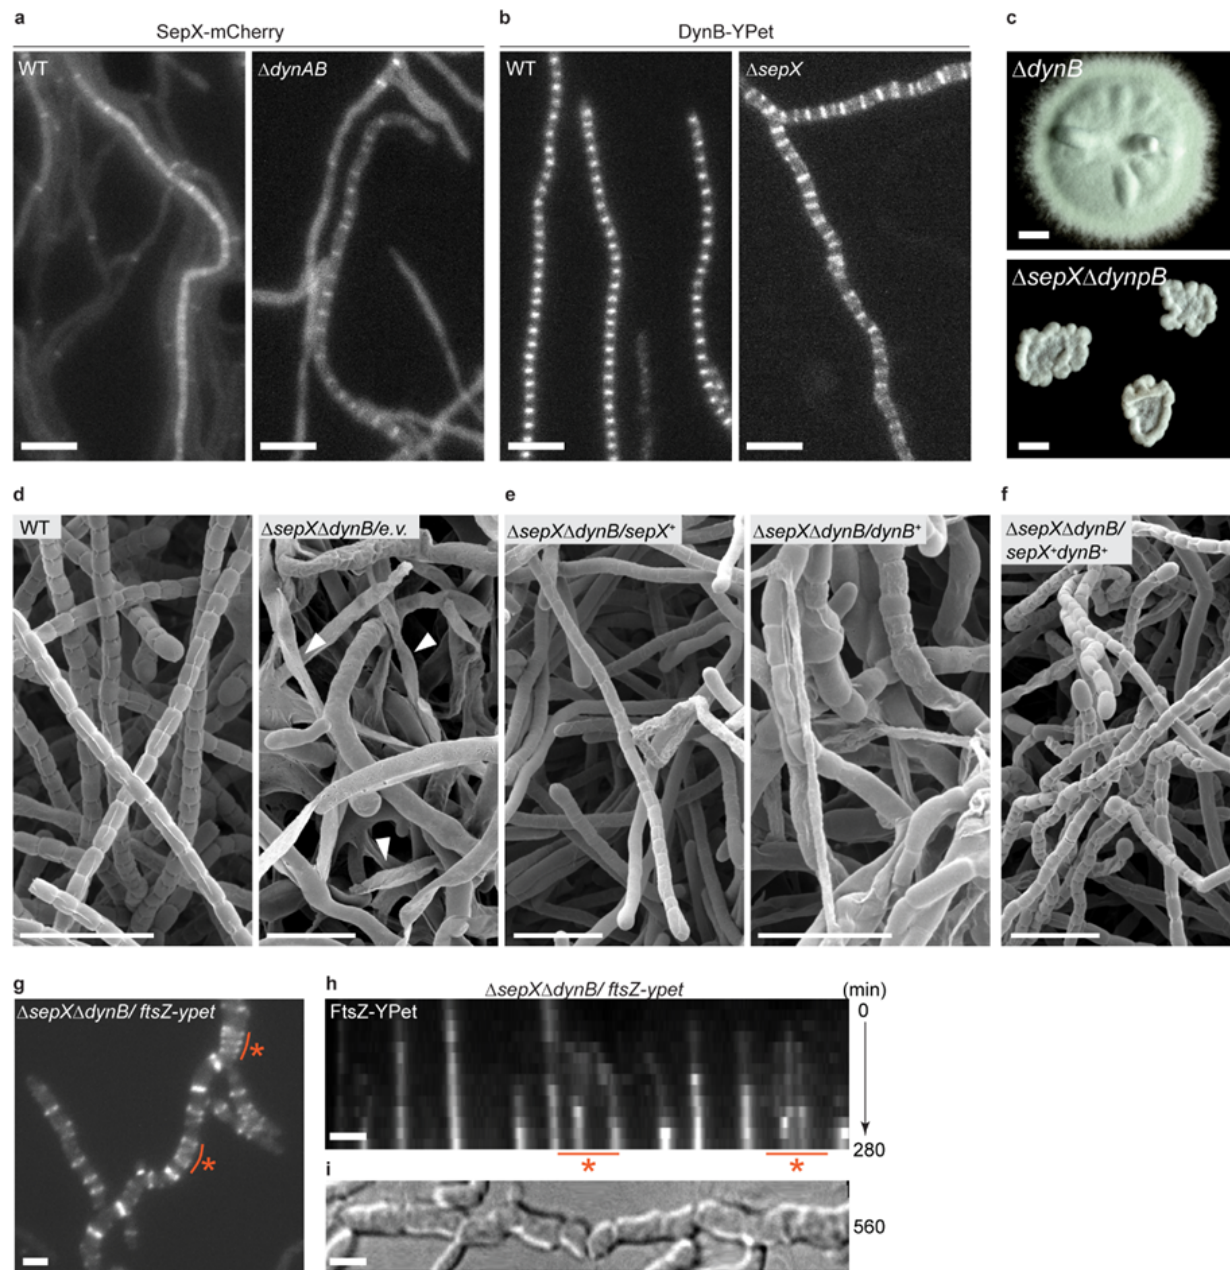

**Figure 6. SepX and DynB function independently during sporulation but cause a synthetic sporulation defect when deleted together.** <Caption goes here. (a) and (b) Microscopic analysis showing the subcellular localization of SepX-mCherry or DynB-YPet in the wildtype (MB256, SS92) or in the absence of either *dynAB* (MB1092) or *sepX* (SS155). Scale bars: 5  $\mu$ m. (c) Colony morphology of the  $\Delta$ *dynB* mutant (SS2) compared to the  $\Delta$ *sepX* $\Delta$ *dynB* double mutant (SV57). Strains were grown for 3 days on solid MYM. Scale bar: 1 mm. (d)-(f) Cryo-SEM images of *S. venezuelae* sporogenic hyphae, including (d) the wildtype (WT) and the  $\Delta$ *sepX* $\Delta$ *dynB* double mutant carrying an empty plasmid (MB1099), white arrow heads in right panel point at lysed hyphae, (e) the  $\Delta$ *sepX* $\Delta$ *dynB* double mutant complemented with either *sepX* (MB1102) or *dynB* (MB1101) expressed from the *ermE*<sup>+</sup> promoter (+), or (f) the  $\Delta$ *sepX* $\Delta$ *dynB* double mutant complemented with both *sepX* and *dynB* (MB1103). Scale bars: 5  $\mu$ m. (g) Still images taken from Supplementary Movie 3 showing FtsZ-YPet localization in the  $\Delta$ *sepX* $\Delta$ *dynB* mutant (MB1111). Orange line and asterisk denote regions of migrating Z-rings. Scale bar: 2  $\mu$ m. (h) and (i) Kymograph showing FtsZ-YPet distribution in a sporulation  $\Delta$ *sepX* $\Delta$ *dynB* hypha presented in (g) with the corresponding DIC image (i) displaying the terminal sporulation phenotype. Orange line and asterisk in (h) correspond to the region highlighted in (g). Scale bars: 2  $\mu$ m.



We further demonstrate by fluorescence time-lapse imaging and kymograph analysis of Z-ring formation that SepX plays a direct role in the assembly process of cytokinetic Z-rings. In the wildtype, FtsZ-YPet accumulates as tight, condensed bands that display a time-dependent increase and decrease in fluorescence intensity, which correlates with the assembly, maturation and constriction of Z-rings. However, in *sepX*-deficient hyphae, Z-rings displayed a lower fluorescence intensity throughout the division process and were on average 10 % wider. Since FtsZ protein abundance is not affected in the *sepX* mutant, these results indicate that in the absence of SepX, Z-rings are spatially less confined. In support of this, we also note that sporulation septa that formed under these conditions were often placed ectopically and divided spores diagonally or perpendicular to the division plane (Supplementary Figure S2f and g). A similar observation was recently reported for several point mutants in the early *Streptomyces* cell division protein SsgB<sup>28</sup>, suggesting that, like SsgB, SepX plays an important role during the initial stages of divisome formation.

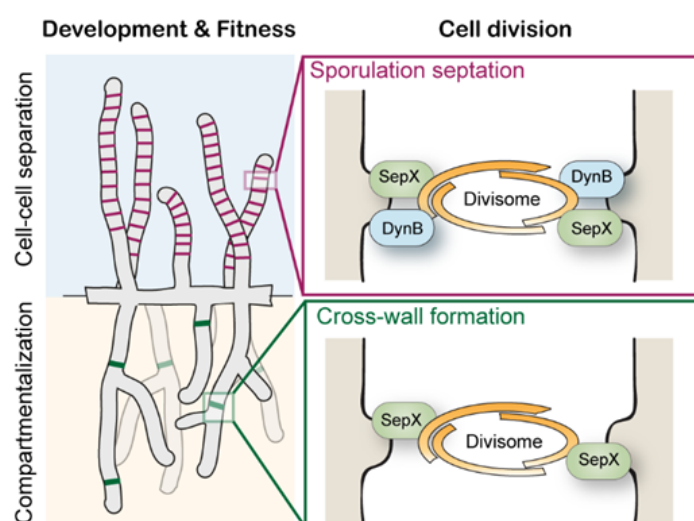

**Figure 7. Proposed model for SepX function in *Streptomyces* cell division.** During vegetative growth, SepX is crucial for the establishment of stable Z-rings leading to cross-wall formation and the compartmentalization of the hyphae which in turn is required for the coordinated progression through the life-cycle and overall fitness of the organism. During reproductive growth, SepX functions together with the dynamin-like protein DynB to ensure the spatial confinement of Z-rings, thereby stabilizing divisome assembly, function and efficient sporulation septation.

Although we did not detect a direct association with FtsZ, SepX copurifies with several known *Streptomyces* divisome components and binds the sporulation-specific divisome component DynB (Figure 5). DynB stabilizes Z-rings via interaction with several divisome components, including DynA, SepF2 and SsgB and likely facilitates the association of SepX with this protein interaction network. Importantly, while SepX and DynB are partially dispensable for sporulation-specific cell division individually, a  $\Delta sepX \Delta dynB$  double mutant largely fails to produce viable spores (Figure 6). In the rare cases where we did observe a sporulation-like process, individual Z-rings were often loose and displayed a dynamic behavior, including spiral-like FtsZ-structures (Figure 6g), demonstrating the combined importance of SepX and DynB for the spatial stabilization of the divisome and efficient sporulation septation.

## MATERIALS AND METHODS

### Bacterial strains, oligonucleotides and growth media

Strains, plasmids and oligonucleotides used in this work are listed in Supplementary Tables 1, 2 and 3 respectively. The *Escherichia coli* K-12 cloning strains TOP10 or DH5 $\alpha$  were used to propagate plasmids and cosmids. BW25113<sup>29</sup> containing the  $\lambda$  RED plasmid, pIJ790, was used to create disrupted cosmids. When required, the following antibiotics were added to the growth medium: 100  $\mu$ g/ml carbenicillin, 50  $\mu$ g/ml kanamycin, 25  $\mu$ g/ml hygromycin, 50  $\mu$ g/ml apramycin, or 25  $\mu$ g/ml chloramphenicol.

*S. venezuelae* was cultured in maltose-yeast extract-malt extract medium (MYM), supplemented with R2 trace element solution at 1:500. Liquid cultures were grown in flasks with springs at 30 °C at 250 rpm. When required, MYM agar contained 5  $\mu$ g/ml kanamycin, 25  $\mu$ g/ml hygromycin, 50  $\mu$ g/ml apramycin or 50  $\mu$ g/ml thiostrepton. Cosmids and plasmids were conjugated from the *E. coli* strain ET12567 containing pUZ8002<sup>30</sup> into *S. venezuelae* as described previously by Bush *et al.*<sup>14</sup>.

### Construction and complementation of the $\Delta sepX$ mutant

Using 'Redirect' PCR targeting<sup>31,32</sup>, the  $\Delta sepX$  mutant was generated in which the central (968 bp) coding region was replaced with a single apramycin resistance cassette. Cosmid 5E03 (<http://strepdb.streptomyces.org.uk/>) was introduced into *E. coli* BW25113 containing pIJ790 and the *sepX* gene (*vnz\_14865*) was replaced with the *apr-oriT* cassette amplified from pIJ773 using the primer pairs mb266 and mb267. The resulting disrupted cosmids were confirmed by PCR analysis using the flanking primers mb1431 and mb1432 and introduced into *S. venezuelae* by conjugation via *E. coli* ET12567/pUZ8002<sup>30</sup>. Homologous recombination gave rise to two distinct morphotypes of exconjugants and their genotypes were confirmed using the flanking primers mb1431 and mb1432. The faster-growing and larger exconjugants were all confirmed to be single cross-over (*Apr<sup>R</sup>*, *Kan<sup>R</sup>*) strains in which the wild-type gene was still present. All double cross-over strains (*Apr<sup>R</sup>*, *Kan<sup>S</sup>*) arose from smaller exconjugants that took 7-10 days to emerge. A representative *sepX* null mutant was designated SV55. For complementation, pMB182 was introduced into the  $\Delta sepX$  mutant by conjugation.

### Construction and complementation of the $\Delta sepX \Delta dynB$ double mutant

To generate a  $\Delta sepX \Delta dynB$  double mutant, the central (968bp) coding region of *sepX* on the 5E03 cosmid was instead replaced with the *hyg-oriT* cassette amplified from pIJ10700 using the identical primer pair mb266 and mb267. Disrupted cosmids were confirmed by PCR using mb1431 and mb1432 and introduced into the *S. venezuelae* *dynB::apr* mutant (SS2) by conjugation<sup>30</sup>. As for the  $\Delta sepX::apr$  mutant (SV55), double cross-overs originated from slow-growing exconjugants (*Hyg<sup>R</sup>*, *Kan<sup>S</sup>*) and were confirmed via PCR-analysis using mb1431 and mb1432. A representative  $\Delta sepX::hyg \Delta dynB::apr$  null mutant was designated SV57. For complementation, pIJ10257 and the pIJ10257-derived plasmids pSS64 and pMB156 were introduced into the SV57 mutant by conjugation, serving to complement *in trans* either *sepX*, *dynB* or both *sepX* and *dynB*.

### Cryo-scanning electron microscopy

*Streptomyces* samples were mounted on an aluminium stub using Tissue Tek<sup>R</sup> (BDH Laboratory Supplies, Poole, England) and plunged into liquid nitrogen slush. The sample was transferred onto the cryo-stage of

an ALTO 2500 cryo-transfer system (Gatan, Oxford, England) attached to either a Zeiss Supra 55 VP FEG scanning electron microscope (Zeiss SMT, Germany) or an FEI Nova NanoSEM 450 (FEI, Eindhoven, The Netherlands). Sublimation of surface frost was performed at -95°C for three minutes before sputter coating with platinum for 150 s at 10 mA. The sample was moved onto the main cryo-stage in the microscope for imaging at 3 kV and digital TIFF files were stored.

### Transmission electron microscopy

*Streptomyces* colonies were excised from agar plates and fixed overnight in 2.5% (v/v) glutaraldehyde in 0.05 M sodium cacodylate, pH 7.3 and post-fixed in 1% (w/v) OsO<sub>4</sub> in 0.05 M sodium cacodylate for 1 h at room temperature. After three, 15-min washes in distilled water, they were dehydrated through an ethanol series and infiltrated with LR White resin (London Resin Company, Reading, Berkshire) which was polymerized at 60°C for 16 hrs. Using a Leica UC6 ultramicrotome (Leica, Milton Keynes), 90nm sections were cut and stained with 2% (w/v) uranyl acetate and 1% (w/v) lead citrate before viewing at either 80 kV in a Jeol 1200 transmission electron microscope (Jeol UK, Welwyn Garden City) or at 200 kV in an FEI Tecnai 20 transmission electron microscope (FEI UK Ltd, Cambridge) and imaged using an AMT digital camera (Deben, Bury St Edmunds, UK) to record TIFF files.

### Light microscopy and image analysis

For imaging protein localization in *S. venezuelae*, cells were grown in MYM medium for 10-20h and a 2-μL sample of the culture was immobilized on a 1% agarose pad. *Streptomyces* hyphae were visualized using a Zeiss Axio Observer Z.1 inverted epifluorescence microscope fitted with a sCMOS camera (Hamamatsu Orca FLASH 4), a Zeiss Colibri 7 LED light source, a Hamamatsu Orca Flash 4.0v3 sCMOS camera, and a temperature-controlled incubation chamber. Unless indicated differently, images were acquired using a Zeiss Alpha Plan-Apo 100x/1.46 Oil DIC M27 objective with the following excitation/emission bandwidths: YFP (489-512nm/520-550nm), mCherry (577-603nm/614-659nm), CFP (401-445nm/460-479nm) and FM4-64 (577-603nm/614-759nm). Still images and time-lapse images series were collected using Zen Blue (Zeiss) and analyzed using Fiji<sup>22</sup>.

Time-lapse fluorescence imaging of FtsZ-YPet localization in *S. venezuelae* wild type (SS12), *ΔsepX* (MB180) and *ΔsepXΔdynB* (MB1111) was performed as previously described (Schlimpert et al., 2016). Briefly, *S. venezuelae* strains were grown in MYM medium for about 36 h at 30°C and 250 rpm to reach complete sporulation. To isolate spores, mycelium was pelleted at 400x g for 1 min. Spores were loaded into B04A microfluidic plates (ONIX, CellASIC), allowed to germinate and grown by perfusing MYM for 3 h before medium was switched to spent-MYM medium. Spent-MYM was prepared from the 36-hour sporulation culture by filtering the growth medium to remove spores and mycelia fragments using a 0.22μm syringe filter. The media flow rate and temperature were maintained at 2 psi and 30°C. Time-lapse imaging was started approximately 8 h after spores had germinated and images were acquired every 10 min or 20 min, respectively, until sporulation was completed.

Kymograph and subsequent image analysis was performed as described in Ramos-Léon et al. (2021)<sup>12</sup>. Briefly, kymographs were generated from registered time-lapse image series of strain SS12 (WT/*ftsZ-ypet*) and SV55 (*ΔsepX/ftsZ-ypet*) using Fiji Reslice plugin. Hyphae undergoing sporulation septation were first identified based on the characteristic FtsZ-YPet localization pattern following the cessation of tip extension. 24 frames (10 min/frame) including one frame immediately before and 22 frames after the cessation of hyphal growth

were isolated. Selected hyphae were “straightened” in Fiji<sup>22</sup> and a segmented line (5 pt) was manually drawn along the center of the straightened hyphae. FtsZ-YPet fluorescence intensity was plotted along this line as a function of time (240 min) using the “Reslice” command. Kymographs were further annotated in Adobe Illustrator. To visualize fluorescence intensities of Z-rings over time, time-lapse series were first corrected for background fluorescence by applying a custom Python script with a multi-Otsu thresholding algorithm. The following steps were performed in Fiji: Z-rings were identified manually in time-lapse series and an ROI of 10x20 pixels was drawn around each Z-ring. The average fluorescence intensity values within each ROI were then collected and the mean fluorescence intensity trace of all Z-rings isolated from either wild-type or *sepH*-deficient hyphae was plotted using Graphpad Prism.

To determine the width and distance of Z-rings, an average fluorescence intensity projection for each of the time-series was first generated in Fiji. The corresponding fluorescence intensity trace along a segmented line (5 pt) manually drawn along the hyphal midline was then extracted, and the obtained data was further processed in R. For each strain, five independent time-lapse series were analysed. Peaks (which correspond to potential Z-rings) were identified using a custom R script and further filtered to remove false-positive peaks with a fluorescence intensity below 100. Z-ring width was calculated by measuring the full width at half maximum of the Z-ring peak in the fluorescence intensity profiles and Z-ring spacing was determined by measuring the distance between neighbouring peaks. Z-ring width and distance values were plotted using Graphpad Prism software.

### FM 4-64 staining

For membrane staining, *Streptomyces* hyphae were incubated with 0.5 mg/ml FM 4-64 Dye (N-(3-Triethylammoniumpropyl)24-(6-(4-(Diethylamino) Phenyl) Hexatrienyl) Pyridinium Dibromide) (Molecular Probes) for 15 min in the dark. Hyphae were then directly spotted onto a 1 % agarose pad and visualized using a Zeiss Axio Observer Z1 microscope using an Alpha Plan-Apo 100x/1.46 Oil DIC M27 objective. Spores of SV55 were loaded into a BA04 microfluidic plate (CellASIC ONIX) and allowed to germinate and to grow using constant perfusion of MYM containing 5.5 μg/ml FM4-64 at 30°C. To promote sporulation, MYM/FM4-64 medium was replaced after 3h of growth by “spent-MYM”/FM4-64. The “spent-MYM” was prepared as described previously<sup>33</sup>. Hyphae were visualized using a Zeiss Axio Observer Z1 microscope equipped with a Plan Apochromat 100x/1.4 Oil Ph3 objective. Images were collected and analyzed using ZenBlue (Zeiss) or Fiji<sup>34</sup>. We note that FM4-64 staining using the ONIX microfluidics systems is inefficient as the membrane dye appears to bind to the internal plate material. Thus, the majority of images shown in the manuscript were generated using cells immobilized on agarose pads.

### Cross-wall staining and analysis

For HADA (7-hydroxycoumarin 3-carboxylic acid-amino-D-alanine) labelling<sup>16</sup>, spores of the wild type carrying an empty plasmid (SS4), SV55, MB182, SS5, SS414 or MB1120 were loaded into BA04 microfluidic plates (CellASIC ONIX). Trapped spores were continuously supplied with MYM containing 0.25 or 0.5 mM HADA at 2 psi at 30 °C. Following spore germination, hyphae were allowed to grow by perfusing MYM-HADA at 2 psi for 4-5 h. Prior to image acquisition MYM-HADA was replaced with MYM and hyphae were visualized using a Zeiss Axio Observer Z1 microscope fitted with a 63x/1.4 Oil BF/DICIII objective. Images were collected using Zen Blue (Zeiss) and analyzed with Fiji<sup>34</sup>. To determine the number of cross-

walls per hyphae, the length of individual hyphae originating from single spores was measured manually and the number of cross-walls present in the respective hypha was recorded. Hyphae from at least 20 independent spores were analyzed per replicate (n=3). Distribution of cross-walls per strain and hyphal length was plotted using GraphPad Prism software.

### Automated Western blotting

Samples of frozen mycelium, originating from 2-5 ml liquid MYM cultures, were resuspended in 0.4 ml ice-cold sonication buffer [20 mM Tris pH 8.0, 5 mM EDTA, 1x EDTA-free protease inhibitors (Sigma Aldrich)] and sonicated (5x 15 sec on/15 sec off) at 4.5-micron amplitude. Lysates were then centrifuged at 16,000 x g for 15 min at 4 °C to remove cell debris. Total protein concentration was determined using the Bradford assay (Biorad). For anti-FtsZ experiments, 1 µg of total protein from each time point was loaded in triplicate into a microplate (ProteinSimple #043-165) and anti-FtsZ antibody (Polyclonal, Cambridge Research Biochemicals)<sup>12</sup> diluted 1:200. FtsZ levels, originating from the wildtype,  $\Delta sepX$  (SV55),  $\Delta dynB$  (SS2),  $\Delta sepX \Delta dynB$  (SV57),  $\Delta sepX \Delta dynB$  carrying the empty vector (MB1099) and the complemented  $\Delta sepX \Delta dynB$  (MB1103) strains were then assayed using the automated Western blotting machine WES (ProteinSimple, San Jose, CA), according to the manufacturer's guidelines. The  $\Delta ftsZ$  (DU669) strain was used as a negative control. For the detection of mCherry protein fusions, 2.5 µg of total protein and anti-mCherry (Abcam 183628) at a 1:200 dilution was used. mCherry levels, originating from wild-type,  $\Delta ftsZ$  and  $\Delta dynAB$  strains (as negative controls) or additionally carrying either  $P_{sepX-sepX-mcherry}$  (MB170) or  $P_{ermE-sepX-mcherry}$  (MB1124, MB1082, MB1092) were then assayed in the same way. For the detection of YPet protein fusions, 1 µg of total protein and anti-GFP (Sigma SAB4301138) at 1:500 dilution was used. YPet levels, originating from wild-type and  $\Delta sepX$  strains (as negative controls) or additionally carrying either  $P_{dynAB-dynB-YPet}$  (SS92, SS155) or  $P_{ermE-dynB-YPet}$  (MB1180, MB1175) were then assayed in the same way.

### Immunoprecipitation for SepX-mCherry detection

To be able to detect SepX-mCherry in whole cell lysates, expressed from either the native *sepX* promoter or the *whiE* promoter, immunoprecipitation was first conducted using RFP-Trap agarose (Chromotek) prior to automated Western blot analysis. The  $\Delta sepX$  (SV55), WT/ $P_{ermE-sepX-mcherry}$  (MB1124),  $\Delta sepX/P_{sepX-sepX-mcherry}$  (MB171) and  $\Delta sepX/P_{whiE-sepX-mcherry}$  (MB1120) strains were grown in 30 ml MYM liquid cultures at 30 °C and 250 rpm to the required growth stage as confirmed by microscopy. Two cultures for each strain were pooled, pelleted, and washed twice with PBS before resuspension in 1.5 ml lysis buffer (10 mM Tris-Cl pH 7.5, 150 mM NaCl, 0.5 mM EDTA, 1% Triton-X-100, 10 mg/ml lysozyme, 1x EDTA-free protease inhibitors [Sigma Aldrich]). Samples were incubated for 25 min at 37°C, placed on ice and lysed by sonication using 8x 20 sec at 8 microns with 1 min on ice between each cycle. Lysates were then centrifuged twice at 4°C and 16,000 x g and the supernatant retained. Total protein concentration was determined by Bradford assay (Biorad) and the lysates were normalized to ensure equal protein input. 25 µl of binding control agarose beads (Chromotek; bab20), prepared in dilution buffer (10 mM Tris-Cl pH 7.5; 150 mM NaCl, 0.5 mM EDTA) were added to each lysate and left to rotate end-over-end for 1 h at 4°C. The beads were sedimented at 2,500 x g and 4°C for 5 min and the supernatant was retained. RFP-Trap agarose beads (Chromotek; rta20) were then added and the lysates again left to rotate end-over-end for 1 h at 4°C. The beads were washed with ice-

cold lysis buffer according to the manufacturer's instructions and eluted in 50 µl 2x SDS dye. 0.5 µl of each sample was subsequently loaded into a microplate for automated Western blot analysis and mCherry levels were determined as described above.

### Co-immunoprecipitation and mass spectrometry

Co-immunoprecipitation experiments using SepX as bait were performed using the SepX-FLAG/DynB-YPet strain (MB942) and the DynB-YPet strain (SS92) as a negative control. Duplicate 30 ml MYM liquid cultures were grown at 30°C and 250 rpm until the sporulation growth stage, as judged by the detection of DynB-YPet, localized to spore septa using fluorescence microscopy. Cultures were pooled, and formaldehyde (Sigma F8775) added to a final concentration of 1%. Cultures were further incubated at 30°C and 250 rpm for 30 mins before quenching the reaction by adding glycine to a final concentration of 125 mM. Cells were pelleted at 4°C and washed twice with ice-cold PBS, resuspended in 1.5 ml lysis buffer (10 mM Tris-Cl pH 8, 150 mM NaCl, 1% Triton-X-100, 10 mg/ml lysozyme, 1x EDTA-free protease inhibitors [Sigma Aldrich]) and incubated for 25 min at 37°C. Samples were then lysed by sonication at 8 x 20 sec at 8 microns with 1 min on ice between each cycle before being centrifuged twice at 4°C and 16,000 x g, retaining the supernatant. SepX-FLAG was pulled down using the µMACS epitope tag protein isolation kit (FLAG 130-101-591) and eluted using Triethylamine pH 11.8 as described in the manufacturer's instructions. Equal volumes of 2x SDS-dye were added to the eluates before heating at 95°C for 3 min. Equal volumes were then loaded onto a 10% acrylamide gel, ran briefly and each sample was cut out of the gel. Proteins contained within the gel slices were digested with trypsin for 8 hrs at pH 7.5 and 40°C and prepared for liquid chromatography-tandem mass spectrometry (LC-MS/MS) as described previously<sup>35</sup> using an Orbitrap Eclipse tribrid mass spectrometer (Thermo Fisher Scientific) and a nanoflow high-performance liquid chromatography (HPLC) system (Dionex Ultimate3000, Thermo Fisher Scientific). MS/MS peaks were analyzed using Mascot v.2.3 (Matrix Science). All Mascot searches were collated and verified with Scaffold (Proteome Software). Accepted proteins passed the following threshold in Scaffold: 95% confidence for protein match and minimum of two unique peptide matches with 95% confidence.

For analysis in R (version 3.6.0)<sup>36</sup>, the "Quantitative values" in Scaffold from both the MB942 and SS92 strains, generated from each of three independent experiments were brought together into one dataframe. The function `impute.knn` (parameters `k = 3` and `rowmax = 0.9`) (package `impute`) was used to impute the missing values. The values were made into a `DGEList` object using the function `DGEList` (package `edgeR`). Appropriate design and contrast matrices were made using the functions `model.matrix` and `makeContrasts` (package `limma`). Function `calcNormFactors` (package `edgeR`) was used to calculate normalisation factors and the `voom` function (package `limma`) to log-transform the data and calculate appropriate observation level weights. To fit linear models the `lmFit` function was applied followed by `contrasts.fit` to compute coefficients (package `limma`). Differential expression values were calculated using the `eBayes` function (package `limma`).

### Bacterial adenylate cyclase two-hybrid assays

To test the interaction between full-length or truncated proteins, coding sequences were amplified using the primers listed in Supplementary Table 1 and cloned in-frame to create the vectors listed in the same table. *E. coli* BTH101 was then co-transformed with 'T25' and 'T18' fusion plasmids. β-galactosidase activity was assayed in biological triplicate in 96-well plates<sup>37</sup>.



# Actinobacterial phylogeny and SepX/DynB ortholog identification

A search set of 673 Actinobacterial genomes were chosen based on annotation as 'reference' or 'representative' at GenBank as of November 2017, along with 10 genomes from Phylum Chloroflexi that serve as outgroups. The Chloroflexi genome *Anaerolinea thermophila* UNI-1 was used to root the tree. Amino acid sequences of 37 conserved housekeeping genes were automatically identified, aligned, and concatenated using Phylosift<sup>38</sup> (Darling *et al.* 2014). Model selection was performed using SMS<sup>39</sup> implemented at <http://www.atgc-montpellier.fr/phyml/><sup>40</sup>, which resulted in selection of a LG substitution model with gamma distributed rate variation between sites. Phylogenetic reconstruction was performed by RAxML version 8.2.10<sup>41</sup> with 100 rapid bootstraps replicates to assess node support. The tree was visualized and formatted using iTOL<sup>42</sup>. Taxonomic assignments were based on the taxonomy database maintained by NCBI (<https://www.ncbi.nlm.nih.gov/Taxonomy/Browser/wwwtax.cgi>). SepX and DynB orthologs were identified based on a reciprocal BLAST search (e-value cutoff = 1e-6) of the same set of 673 Actinobacterial genomes, using the *S. venezuelae* SepX/DynB sequences as a query (*vnz\_14865* and *vnz\_12105*, respectively). For members of the genus *Streptomyces*, this ortholog search was additionally performed on available genomes associated with each species' NCBI Taxonomy ID as of October 2020.

## Author Contributions and Notes

MJB and SS conceived the study, performed experiments and interpreted data, KAG performed phylogenetic analysis, GC conducted computational analyses, KCF performed electron microscopy experiments. SS supervised project. MJB and SS wrote the manuscript which was approved by all co-authors.

The authors declare no conflict of interest.

This article contains supporting information online.

## Acknowledgments

We thank Carlo de Oliveira Martins for proteomics analyses. We are also grateful to David Kysela for assistance with the phylogenetic analysis, Phil Robinson for taking photographs of *Streptomyces* colonies, and the members of the JIC Bioimaging platform, including Elaine Barclay for help with electron microscopy and Sergio Lopez for support with image analysis. We thank Joseph W. Sallmen for helpful comments on the manuscript. This work was funded by the Royal Society (URF\R1\180075) to SS and by the BBSRC Institute Strategic Program grant BBS/E/J000PR9791 to the John Innes Centre.

## REFERENCES

1. Wildermuth, H. & Hopwood, D. A. Septation during sporulation in *Streptomyces coelicolor*. *J Gen Microbiol* **60**, 51–59 (1970).
2. Becher, P. G. *et al.* Developmentally regulated volatiles geosmin and 2-methylisoborneol attract a soil arthropod to *Streptomyces* bacteria promoting spore dispersal. *Nature Microbiology* **5**, 821–829 (2020).
3. Bobek, J., Šmídová, K. & Čihák, M. A Waking Review: Old and novel insights into the spore germination in *Streptomyces*. *Front. Microbiol.* **8**, 2205 (2017).
4. Bisson-Filho, A. W. *et al.* Treadmilling by FtsZ filaments drives peptidoglycan synthesis and bacterial cell division. *Science* **355**, 739–743 (2017).

5. Yang, X. *et al.* GTPase activity-coupled treadmilling of the bacterial tubulin FtsZ organizes septal cell wall synthesis. *Science* **355**, 744–747 (2017).
6. Cantlay, S., Sen, B. C., Flärdh, K. & McCormick, J. R. Influence of core divisome proteins on cell division in *Streptomyces venezuelae* ATCC 10712. *Microbiology* (2021) doi:10.1099/mic.0.001015.
7. McCormick, J. R. Cell division is dispensable but not irrelevant in *Streptomyces*. *Curr. Opin. Microbiol.* **12**, 689–698 (2009).
8. Willemse, J., Borst, J. W., de Waal, E., Bisseling, T. & van Wezel, G. P. Positive control of cell division: FtsZ is recruited by SsgB during sporulation of *Streptomyces*. *Genes Dev* **25**, 89–99 (2011).
9. Duman, R. *et al.* Structural and genetic analyses reveal the protein SepF as a new membrane anchor for the Z ring. *PNAS* **110**, E4601–E4610 (2013).
10. Gola, S., Munder, T., Casonato, S., Manganelli, R. & Vicente, M. The essential role of SepF in mycobacterial division. *Molecular Microbiology* **97**, 560–576 (2015).
11. Schlimpert, S. *et al.* Two dynamin-like proteins stabilize FtsZ rings during *Streptomyces* sporulation. *Proc Natl Acad Sci USA* **114**, E6176–E6183 (2017).
12. Ramos-León, F. *et al.* A conserved cell division protein directly regulates FtsZ dynamics in filamentous and unicellular actinobacteria. *eLife* **10**, e63387 (2021).
13. Mistry, B. V., Sol, R. D., Wright, C., Findlay, K. & Dyson, P. FtsW is a dispensable cell division protein required for Z-Ring stabilization during sporulation septation in *Streptomyces coelicolor*. *J. Bacteriol.* **190**, 5555–5566 (2008).
14. Bush, M. J., Bibb, M. J., Chandra, G., Findlay, K. C. & Buttner, M. J. Genes required for aerial growth, cell division, and chromosome segregation are targets of WhiA before sporulation in *Streptomyces venezuelae*. *mBio* **4**, e00684-13 (2013).
15. Bush, M. J., Chandra, G., Bibb, M. J., Findlay, K. C. & Buttner, M. J. Genome-Wide chromatin immunoprecipitation sequencing analysis shows that WhiB is a transcription factor that cocontrols its regulon with WhiA to initiate developmental cell division in *Streptomyces*. *mBio* **7**, e00523-16, /mbio/7/2/e00523-16.atom (2016).
16. Kuru, E., Tekkam, S., Hall, E., Brun, Y. V. & Van Nieuwenhze, M. S. Synthesis of fluorescent D-amino acids and their use for probing peptidoglycan synthesis and bacterial growth in situ. *Nat. Protoc* **10**, 33–52 (2015).
17. Bibb, M. J., Janssen, G. R. & Ward, J. M. Cloning and analysis of the promoter region of the erythromycin-resistance gene (*ermE*) of *Streptomyces erythraeus*. *Gene* **41**, E357–E368 (1986).
18. Ryding, N. J. *et al.* New Sporulation Loci in *Streptomyces coelicolor* A3(2). *J. Bacteriol.* **181**, 5419–5425 (1999).
19. Bibb, M. J., Domonkos, Á., Chandra, G. & Buttner, M. J. Expression of the chaplin and rodlin hydrophobic sheath proteins in *Streptomyces venezuelae* is controlled by  $\sigma$ BldN and a cognate anti-sigma factor, RsbN. *Mol. Microbiol.* **84**, 1033–1049 (2012).
20. Kelemen, G. H. *et al.* Developmental regulation of transcription of *whiE*, a locus specifying the polyketide spore pigment in *Streptomyces coelicolor* A3(2). *J. Bacteriol.* **180**, 2515–2521 (1998).
21. Schwedock, J., McCormick, J. R., Angert, E. R., Nodwell, J. R. & Losick, R. Assembly of the cell division protein FtsZ into ladder-like structures in the aerial hyphae of *Streptomyces coelicolor*. *Mol. Microbiol.* **25**, 847–858 (1997).
22. Schindelin, J. *et al.* Fiji - an Open Source platform for biological image analysis. *Nat. Methods* **9**, (2012).

23. Celler, K., Koning, R. I., Willemse, J., Koster, A. J. & van Wezel, G. P. Cross-membranes orchestrate compartmentalization and morphogenesis in *Streptomyces*. *Nat. Commun.* **7**, ncomms11836 (2016).
24. Yagüe, P. *et al.* Subcompartmentalization by cross-membranes during early growth of *Streptomyces* hyphae. *Nat. Commun.* **7**, 12467 (2016).
25. Santos-Beneit, F., Roberts, D. M., Cantlay, S., McCormick, J. R. & Errington, J. A mechanism for FtsZ-independent proliferation in *Streptomyces*. *Nat. Commun.* **8**, 1378 (2017).
26. McCormick, J. R., Su, E. P., Driks, A. & Losick, R. Growth and viability of *Streptomyces coelicolor* mutant for the cell division gene *ftsZ*. *Mol. Microbiol.* **14**, 243–254 (1994).
27. Zacharia, V. M. *et al.* Genetic Network architecture and environmental cues drive spatial organization of phenotypic division of labor in *Streptomyces coelicolor*. *mBio* **12**, (2021).
28. Xiao, X. *et al.* Ectopic positioning of the cell division plane is associated with single amino acid substitutions in the FtsZ-recruiting SsgB in *Streptomyces*. *Open Biology* **11**, 200409.
29. Datsenko, K. A. & Wanner, B. L. One-step inactivation of chromosomal genes in *Escherichia coli* K-12 using PCR products. *PNAS* **97**, 6640–6645 (2000).
30. Paget, M. S. B., Chamberlin, L., Atrih, A., Foster, S. J. & Buttner, M. J. Evidence that the extracytoplasmic function sigma Factor  $\sigma^E$  is required for normal cell wall structure in *Streptomyces coelicolor* A3(2). *J. Bacteriol.* **181**, 8 (1999).
31. Gust, B., Challis, G. L., Fowler, K., Kieser, T. & Chater, K. F. PCR-targeted *Streptomyces* gene replacement identifies a protein domain needed for biosynthesis of the sesquiterpene soil odor geosmin. *Proc Natl Acad Sci USA* **100**, 1541–1546 (2003).
32. Gust, B. *et al.*  $\lambda$  Red-Mediated Genetic Manipulation of Antibiotic-Producing *Streptomyces*. in *Adv. Appl. Microbiol.* vol. **54** 107–128 (Academic Press, 2004).
33. Schlimpert, S., Flärdh, K. & Buttner, M. J. Fluorescence time-lapse imaging of the complete *S. venezuelae* life cycle using a microfluidic device. *JoVE* 53863 (2016) doi:10.3791/53863.
34. Schindelin, J. *et al.* Fiji - an Open Source platform for biological image analysis. *Nat Methods* **9**, (2012).
35. Bender, K. W. *et al.* Autophosphorylation-based Calcium (Ca<sup>2+</sup>) Sensitivity Priming and Ca<sup>2+</sup>/Calmodulin Inhibition of *Arabidopsis thaliana* Ca<sup>2+</sup>-dependent Protein Kinase 28 (CPK28). *J Biol Chem* **292**, 3988–4002 (2017).
36. R Core Team (2019) R: A Language and Environment for Statistical Computing. R Foundation for Statistical Computing, Vienna, Austria.
37. Griffith, K. L. & Wolf, R. E. Measuring  $\beta$ -Galactosidase activity in bacteria: cell growth, permeabilization, and enzyme assays in 96-Well arrays. *Biochemical and Biophysical Research Communications* **290**, 397–402 (2002).
38. Darling, A. E. *et al.* PhyloSift: phylogenetic analysis of genomes and metagenomes. *PeerJ* **2**, e243 (2014).
39. Lefort, V., Longueville, J.-E. & Gascuel, O. SMS: Smart Model Selection in PhyML. *Mol. Biol. Evol.* **34**, 2422–2424 (2017).
40. Guindon, S. *et al.* New algorithms and methods to estimate maximum-likelihood phylogenies: Assessing the performance of PhyML 3.0. *Syst Biol* **59**, 307–321 (2010).
41. Stamatakis, A. RAxML version 8: a tool for phylogenetic analysis and post-analysis of large phylogenies. *Bioinformatics* **30**, 1312–1313 (2014).
42. Letunic, I. & Bork, P. Interactive Tree Of Life (iTOL) v4: recent updates and new developments. *Nucleic Acids Res.* **47**, W256–W259 (2019).
43. Al-Bassam, M. M., Bibb, M. J., Bush, M. J., Chandra, G. & Buttner, M. J. Response Regulator Heterodimer Formation Controls a Key Stage in *Streptomyces* Development. *PLOS Genetics* **10**, e1004554 (2014).
